# Supplementary material
Source: PubMed Central journal article supplement (PMC3019606)
Supplement: NIHMS262521-supplement-01.pdf [file NIHMS262521-supplement-01.pdf]

Type of file: figure

Label: Figures

Filename: suppfigs.doc

Supplemental Figure 1. D' linkage disequilibrium plots for *RXRA* (A) and *VDR* (B)

A.

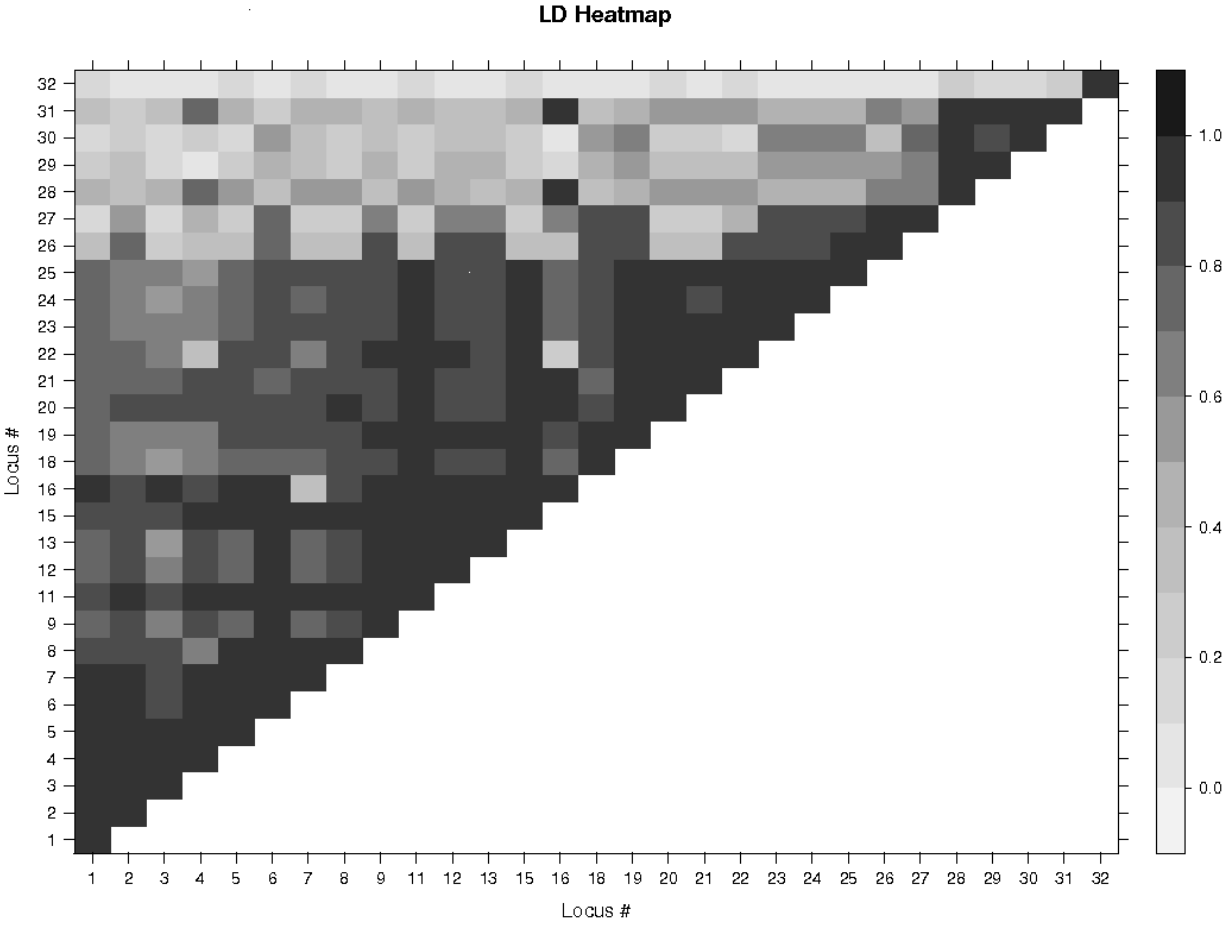

B.

LD Heatmap

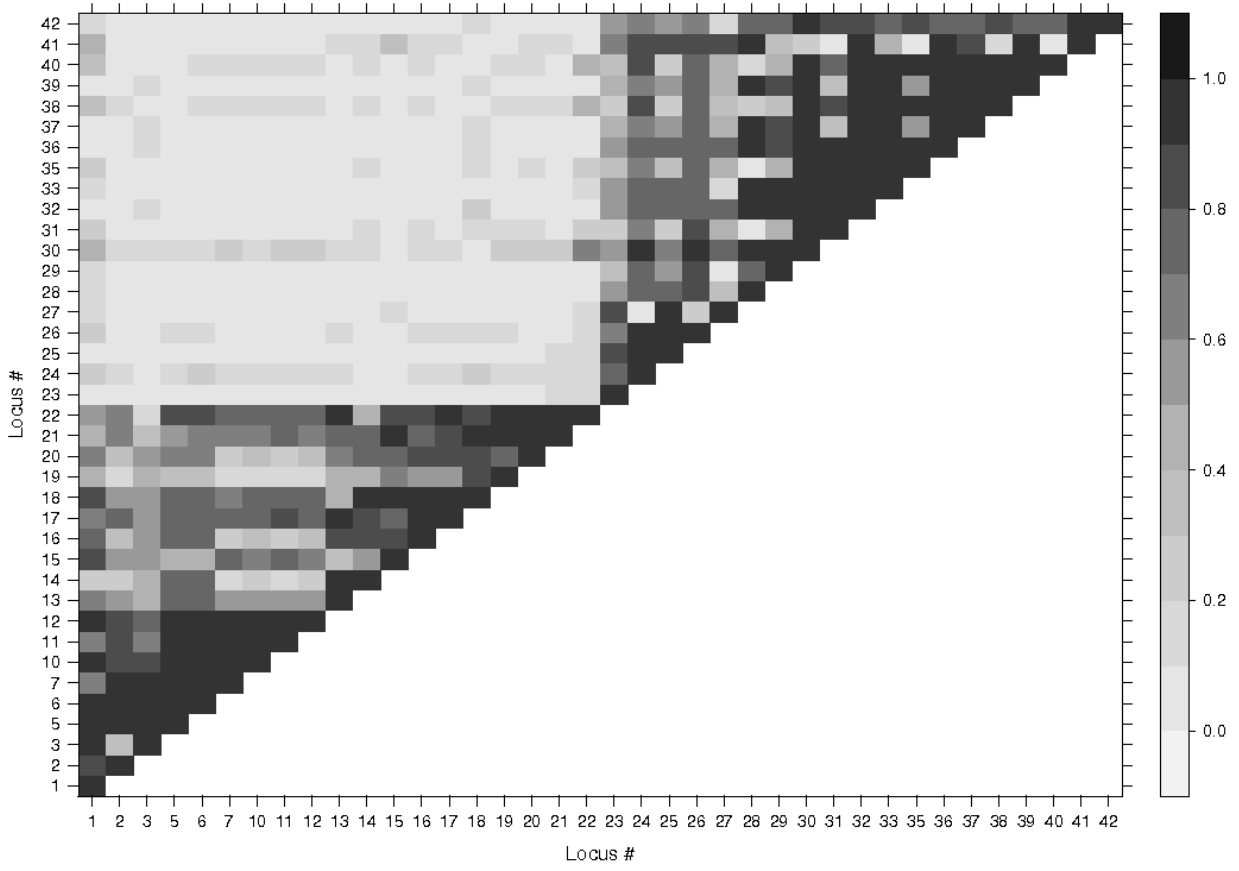

Type of file: table

Label: Tables

Filename: supptables.doc

**Supplemental Table 1. Association between SNPs on *RXRA* gene (chromosome 9) and metachronous colorectal neoplasia**

| SNP             | Position  | Locus <sup>1</sup> | Additive inheritance |       |   |      |                   | Dominant inheritance |       |      |   |                   | Recessive inheritance |       |      |      |                   |      |       |       |
|-----------------|-----------|--------------------|----------------------|-------|---|------|-------------------|----------------------|-------|------|---|-------------------|-----------------------|-------|------|------|-------------------|------|-------|-------|
|                 |           |                    | OR                   | 95%CI |   | p    | pACT <sup>2</sup> | OR                   | 95%CI |      | p | pACT <sup>2</sup> | OR                    | 95%CI |      | p    | pACT <sup>2</sup> |      |       |       |
| <b>Any site</b> |           |                    |                      |       |   |      |                   |                      |       |      |   |                   |                       |       |      |      |                   |      |       |       |
| rs1007971       | 134561859 | 1                  | 1.19                 | 0.98  | - | 1.43 | 0.075             | 0.862                | 1.18  | 0.95 | - | 1.47              | 0.134                 | 0.967 | 1.53 | 0.87 | -                 | 2.70 | 0.144 | 0.973 |
| rs10114634      | 134527207 | 2                  | 0.77                 | 0.53  | - | 1.12 | 0.169             | 0.985                | 0.78  | 0.53 | - | 1.14              | 0.191                 | 0.989 | NA   | NA   | -                 | NA   | NA    | NA    |
| rs1045570       | 134558256 | 3                  | 0.98                 | 0.80  | - | 1.21 | 0.857             | 1.000                | 0.98  | 0.78 | - | 1.24              | 0.888                 | 1.000 | 0.92 | 0.42 | -                 | 2.05 | 0.844 | 1.000 |
| rs10776909      | 134514691 | 4                  | 1.17                 | 0.97  | - | 1.40 | 0.096             | 0.914                | 1.25  | 1.01 | - | 1.55              | 0.038                 | 0.657 | 0.91 | 0.53 | -                 | 1.56 | 0.729 | 1.000 |
| rs11102986      | 134511490 | 5                  | 1.12                 | 0.93  | - | 1.36 | 0.234             | 0.996                | 1.16  | 0.93 | - | 1.45              | 0.181                 | 0.989 | 1.02 | 0.54 | -                 | 1.89 | 0.960 | 1.000 |
| rs11103473      | 134513574 | 6                  | 0.97                 | 0.83  | - | 1.14 | 0.744             | 1.000                | 0.96  | 0.77 | - | 1.18              | 0.678                 | 1.000 | 0.99 | 0.72 | -                 | 1.38 | 0.971 | 1.000 |
| rs12004589      | 134516670 | 7                  | 0.76                 | 0.60  | - | 0.96 | 0.022             | 0.482                | 0.74  | 0.57 | - | 0.97              | 0.027                 | 0.554 | 0.58 | 0.23 | -                 | 1.45 | 0.247 | 0.997 |
| rs12004786      | 134536181 | 8                  | 0.85                 | 0.41  | - | 1.74 | 0.647             | 1.000                | 0.85  | 0.41 | - | 1.74              | 0.647                 | 1.000 | NA   | NA   | -                 | NA   | NA    | NA    |
| rs1536475       | 134547101 | 9                  | 1.05                 | 0.87  | - | 1.27 | 0.584             | 1.000                | 1.07  | 0.86 | - | 1.34              | 0.531                 | 1.000 | 1.01 | 0.58 | -                 | 1.76 | 0.967 | 1.000 |
| rs1805343       | 134554231 | 10                 | 0.96                 | 0.82  | - | 1.12 | 0.579             | 1.000                | 0.92  | 0.75 | - | 1.14              | 0.442                 | 1.000 | 1.01 | 0.72 | -                 | 1.40 | 0.971 | 1.000 |
| rs1805352       | 134525894 | 11                 | 0.90                 | 0.77  | - | 1.06 | 0.224             | 0.995                | 0.87  | 0.71 | - | 1.08              | 0.208                 | 0.992 | 0.90 | 0.62 | -                 | 1.31 | 0.595 | 1.000 |
| rs3118523       | 134561466 | 12                 | 1.12                 | 0.92  | - | 1.35 | 0.270             | 0.998                | 1.09  | 0.88 | - | 1.36              | 0.432                 | 1.000 | 1.53 | 0.82 | -                 | 2.85 | 0.185 | 0.989 |
| rs3118526       | 134563302 | 13                 | 1.25                 | 0.99  | - | 1.57 | 0.060             | 0.801                | 1.28  | 0.99 | - | 1.64              | 0.058                 | 0.793 | 1.31 | 0.53 | -                 | 3.25 | 0.554 | 1.000 |
| rs3118529       | 134530860 | 14                 | 0.90                 | 0.77  | - | 1.06 | 0.227             | 0.995                | 0.88  | 0.71 | - | 1.08              | 0.219                 | 0.994 | 0.90 | 0.62 | -                 | 1.30 | 0.570 | 1.000 |
| rs3118535       | 134531766 | 15                 | 0.98                 | 0.74  | - | 1.30 | 0.894             | 1.000                | 1.00  | 0.74 | - | 1.36              | 0.976                 | 1.000 | 0.59 | 0.15 | -                 | 2.36 | 0.454 | 1.000 |
| rs3118536       | 134534407 | 16                 | 1.09                 | 0.89  | - | 1.32 | 0.413             | 1.000                | 1.13  | 0.91 | - | 1.42              | 0.277                 | 0.998 | 0.87 | 0.46 | -                 | 1.64 | 0.665 | 1.000 |
| rs3118570       | 134546800 | 17                 | 1.06                 | 0.88  | - | 1.29 | 0.527             | 1.000                | 1.09  | 0.87 | - | 1.36              | 0.460                 | 1.000 | 1.00 | 0.56 | -                 | 1.78 | 0.997 | 1.000 |
| rs3118571       | 134544123 | 18                 | 0.94                 | 0.80  | - | 1.10 | 0.438             | 1.000                | 0.88  | 0.71 | - | 1.08              | 0.215                 | 0.993 | 1.05 | 0.76 | -                 | 1.46 | 0.757 | 1.000 |
| rs3132293       | 134551767 | 19                 | 0.93                 | 0.78  | - | 1.10 | 0.397             | 1.000                | 0.94  | 0.76 | - | 1.16              | 0.551                 | 1.000 | 0.81 | 0.52 | -                 | 1.27 | 0.355 | 1.000 |
| rs3132296       | 134528576 | 20                 | 0.90                 | 0.76  | - | 1.06 | 0.204             | 0.991                | 0.87  | 0.71 | - | 1.07              | 0.192                 | 0.988 | 0.90 | 0.61 | -                 | 1.31 | 0.569 | 1.000 |
| rs3132297       | 134527811 | 21                 | 1.12                 | 0.92  | - | 1.36 | 0.269             | 0.998                | 1.17  | 0.94 | - | 1.47              | 0.157                 | 0.980 | 0.86 | 0.45 | -                 | 1.64 | 0.642 | 1.000 |
| rs3132299       | 134524760 | 22                 | 1.05                 | 0.87  | - | 1.28 | 0.595             | 1.000                | 1.11  | 0.89 | - | 1.38              | 0.364                 | 1.000 | 0.77 | 0.41 | -                 | 1.43 | 0.405 | 1.000 |
| rs3132300       | 134521430 | 23                 | 1.03                 | 0.86  | - | 1.24 | 0.725             | 1.000                | 1.05  | 0.85 | - | 1.31              | 0.625                 | 1.000 | 0.95 | 0.55 | -                 | 1.62 | 0.844 | 1.000 |
| rs3132301       | 134519975 | 24                 | 1.06                 | 0.88  | - | 1.28 | 0.564             | 1.000                | 1.09  | 0.88 | - | 1.36              | 0.436                 | 1.000 | 0.92 | 0.51 | -                 | 1.64 | 0.766 | 1.000 |
| rs4240705       | 134537345 | 25                 | 0.97                 | 0.83  | - | 1.13 | 0.690             | 1.000                | 0.94  | 0.76 | - | 1.16              | 0.568                 | 1.000 | 1.01 | 0.73 | -                 | 1.38 | 0.965 | 1.000 |
| rs4240711       | 134555251 | 26                 | 0.96                 | 0.82  | - | 1.12 | 0.602             | 1.000                | 0.91  | 0.74 | - | 1.12              | 0.360                 | 1.000 | 1.06 | 0.76 | -                 | 1.48 | 0.728 | 1.000 |
| rs4842196       | 134559173 | 27                 | 1.00                 | 0.84  | - | 1.19 | 0.998             | 0.998                | 0.97  | 0.79 | - | 1.20              | 0.783                 | 1.000 | 1.14 | 0.73 | -                 | 1.77 | 0.567 | 1.000 |

|           |           |    |      |      |   |      |       |       |      |      |   |      |       |       |      |      |   |      |       |       |
|-----------|-----------|----|------|------|---|------|-------|-------|------|------|---|------|-------|-------|------|------|---|------|-------|-------|
| rs748964  | 134560034 | 28 | 1.24 | 0.99 | - | 1.55 | 0.064 | 0.819 | 1.28 | 1.00 | - | 1.64 | 0.046 | 0.720 | 1.07 | 0.45 | - | 2.54 | 0.878 | 1.000 |
| rs7861779 | 134535406 | 29 | 0.74 | 0.59 | - | 0.92 | 0.007 | 0.204 | 0.69 | 0.54 | - | 0.88 | 0.003 | 0.100 | 0.94 | 0.44 | - | 2.03 | 0.878 | 1.000 |
| rs875444  | 134521249 | 30 | 0.92 | 0.79 | - | 1.07 | 0.297 | 0.999 | 0.85 | 0.69 | - | 1.06 | 0.144 | 0.973 | 1.00 | 0.74 | - | 1.34 | 0.997 | 1.000 |
| rs877954  | 134552353 | 21 | 0.93 | 0.80 | - | 1.09 | 0.379 | 1.000 | 0.87 | 0.70 | - | 1.07 | 0.186 | 0.988 | 1.04 | 0.75 | - | 1.45 | 0.818 | 1.000 |
| rs9409929 | 134566458 | 32 | 0.90 | 0.77 | - | 1.05 | 0.181 | 0.989 | 0.83 | 0.67 | - | 1.03 | 0.088 | 0.898 | 0.97 | 0.71 | - | 1.33 | 0.857 | 1.000 |

**Proximal Neoplasia**

|            |           |    |      |      |   |      |       |       |      |      |   |      |       |       |      |      |   |      |       |       |
|------------|-----------|----|------|------|---|------|-------|-------|------|------|---|------|-------|-------|------|------|---|------|-------|-------|
| rs1007971  | 134561859 | 1  | 1.15 | 0.95 | - | 1.40 | 0.161 | 0.976 | 1.11 | 0.88 | - | 1.39 | 0.384 | 1.000 | 1.76 | 1.00 | - | 3.10 | 0.052 | 0.748 |
| rs10114634 | 134527207 | 2  | 0.63 | 0.41 | - | 0.97 | 0.034 | 0.620 | 0.63 | 0.41 | - | 0.97 | 0.037 | 0.650 | NA   | NA   | - | NA   | NA    | NA    |
| rs1045570  | 134558256 | 3  | 0.93 | 0.75 | - | 1.17 | 0.540 | 1.000 | 0.94 | 0.73 | - | 1.20 | 0.607 | 1.000 | 0.78 | 0.32 | - | 1.89 | 0.584 | 1.000 |
| rs10776909 | 134514691 | 4  | 1.21 | 1.00 | - | 1.46 | 0.055 | 0.758 | 1.22 | 0.98 | - | 1.53 | 0.080 | 0.857 | 1.41 | 0.81 | - | 2.45 | 0.227 | 0.995 |
| rs11102986 | 134511490 | 5  | 1.15 | 0.94 | - | 1.41 | 0.183 | 0.986 | 1.12 | 0.89 | - | 1.42 | 0.321 | 0.999 | 1.60 | 0.85 | - | 2.99 | 0.143 | 0.967 |
| rs11103473 | 134513574 | 6  | 0.96 | 0.81 | - | 1.13 | 0.616 | 1.000 | 0.89 | 0.71 | - | 1.11 | 0.309 | 0.999 | 1.10 | 0.78 | - | 1.55 | 0.595 | 1.000 |
| rs12004589 | 134516670 | 7  | 0.71 | 0.55 | - | 0.92 | 0.010 | 0.280 | 0.71 | 0.54 | - | 0.95 | 0.021 | 0.469 | 0.33 | 0.10 | - | 1.12 | 0.076 | 0.852 |
| rs12004786 | 134536181 | 8  | 0.58 | 0.25 | - | 1.36 | 0.209 | 0.993 | 0.58 | 0.25 | - | 1.36 | 0.209 | 0.992 | NA   | NA   | - | NA   | NA    | NA    |
| rs1536475  | 134547101 | 9  | 1.04 | 0.85 | - | 1.27 | 0.703 | 1.000 | 1.00 | 0.79 | - | 1.26 | 1.000 | 1.000 | 1.38 | 0.78 | - | 2.43 | 0.264 | 0.998 |
| rs1805343  | 134554231 | 10 | 0.95 | 0.80 | - | 1.12 | 0.508 | 1.000 | 0.91 | 0.73 | - | 1.13 | 0.389 | 1.000 | 0.99 | 0.70 | - | 1.41 | 0.964 | 1.000 |
| rs1805352  | 134525894 | 11 | 0.85 | 0.72 | - | 1.02 | 0.076 | 0.852 | 0.81 | 0.65 | - | 1.01 | 0.067 | 0.817 | 0.85 | 0.57 | - | 1.27 | 0.426 | 1.000 |
| rs3118523  | 134561466 | 12 | 1.01 | 0.82 | - | 1.24 | 0.910 | 1.000 | 0.98 | 0.78 | - | 1.24 | 0.872 | 1.000 | 1.30 | 0.69 | - | 2.46 | 0.417 | 1.000 |
| rs3118526  | 134563302 | 13 | 1.24 | 0.97 | - | 1.57 | 0.083 | 0.866 | 1.25 | 0.96 | - | 1.63 | 0.095 | 0.898 | 1.47 | 0.59 | - | 3.69 | 0.406 | 1.000 |
| rs3118529  | 134530860 | 14 | 0.85 | 0.72 | - | 1.02 | 0.078 | 0.855 | 0.82 | 0.66 | - | 1.02 | 0.079 | 0.857 | 0.83 | 0.55 | - | 1.25 | 0.373 | 1.000 |
| rs3118535  | 134531766 | 15 | 1.11 | 0.83 | - | 1.49 | 0.495 | 1.000 | 1.15 | 0.84 | - | 1.58 | 0.374 | 1.000 | 0.58 | 0.12 | - | 2.78 | 0.492 | 1.000 |
| rs3118536  | 134534407 | 16 | 1.07 | 0.87 | - | 1.31 | 0.546 | 1.000 | 1.06 | 0.84 | - | 1.34 | 0.633 | 1.000 | 1.22 | 0.64 | - | 2.33 | 0.551 | 1.000 |
| rs3118570  | 134546800 | 17 | 1.07 | 0.88 | - | 1.31 | 0.501 | 1.000 | 1.05 | 0.83 | - | 1.33 | 0.682 | 1.000 | 1.34 | 0.74 | - | 2.41 | 0.333 | 1.000 |
| rs3118571  | 134544123 | 18 | 0.93 | 0.79 | - | 1.10 | 0.381 | 1.000 | 0.88 | 0.70 | - | 1.10 | 0.256 | 0.997 | 0.99 | 0.70 | - | 1.40 | 0.945 | 1.000 |
| rs3132293  | 134551767 | 19 | 0.93 | 0.77 | - | 1.12 | 0.436 | 1.000 | 0.91 | 0.73 | - | 1.14 | 0.433 | 1.000 | 0.92 | 0.57 | - | 1.48 | 0.723 | 1.000 |
| rs3132296  | 134528576 | 20 | 0.85 | 0.71 | - | 1.01 | 0.069 | 0.822 | 0.81 | 0.65 | - | 1.01 | 0.057 | 0.765 | 0.86 | 0.57 | - | 1.28 | 0.451 | 1.000 |
| rs3132297  | 134527811 | 21 | 1.08 | 0.88 | - | 1.33 | 0.453 | 1.000 | 1.09 | 0.86 | - | 1.37 | 0.498 | 1.000 | 1.19 | 0.61 | - | 2.32 | 0.615 | 1.000 |
| rs3132299  | 134524760 | 22 | 1.07 | 0.87 | - | 1.31 | 0.506 | 1.000 | 1.08 | 0.86 | - | 1.36 | 0.506 | 1.000 | 1.09 | 0.58 | - | 2.06 | 0.790 | 1.000 |
| rs3132300  | 134521430 | 23 | 1.00 | 0.82 | - | 1.22 | 0.985 | 1.000 | 0.97 | 0.77 | - | 1.22 | 0.797 | 1.000 | 1.22 | 0.70 | - | 2.12 | 0.485 | 1.000 |
| rs3132301  | 134519975 | 24 | 1.07 | 0.87 | - | 1.30 | 0.522 | 1.000 | 1.05 | 0.83 | - | 1.32 | 0.709 | 1.000 | 1.34 | 0.74 | - | 2.41 | 0.333 | 1.000 |
| rs4240705  | 134537345 | 25 | 0.95 | 0.80 | - | 1.12 | 0.511 | 1.000 | 0.95 | 0.75 | - | 1.18 | 0.624 | 1.000 | 0.90 | 0.64 | - | 1.27 | 0.546 | 1.000 |
| rs4240711  | 134555251 | 26 | 0.95 | 0.80 | - | 1.12 | 0.523 | 1.000 | 0.90 | 0.72 | - | 1.12 | 0.329 | 1.000 | 1.04 | 0.73 | - | 1.47 | 0.847 | 1.000 |

|           |           |    |      |      |   |      |       |       |      |      |   |      |       |       |      |      |   |      |       |       |
|-----------|-----------|----|------|------|---|------|-------|-------|------|------|---|------|-------|-------|------|------|---|------|-------|-------|
| rs4842196 | 134559173 | 27 | 0.97 | 0.81 | - | 1.17 | 0.752 | 1.000 | 0.93 | 0.74 | - | 1.16 | 0.523 | 1.000 | 1.13 | 0.71 | - | 1.79 | 0.600 | 1.000 |
| rs748964  | 134560034 | 28 | 1.17 | 0.92 | - | 1.48 | 0.196 | 0.990 | 1.18 | 0.92 | - | 1.53 | 0.198 | 0.990 | 1.24 | 0.51 | - | 3.01 | 0.635 | 1.000 |
| rs7861779 | 134535406 | 29 | 0.68 | 0.53 | - | 0.86 | 0.001 | 0.059 | 0.65 | 0.50 | - | 0.85 | 0.001 | 0.059 | 0.57 | 0.23 | - | 1.42 | 0.229 | 0.995 |
| rs875444  | 134521249 | 30 | 0.92 | 0.78 | - | 1.09 | 0.346 | 1.000 | 0.82 | 0.65 | - | 1.03 | 0.091 | 0.889 | 1.08 | 0.79 | - | 1.48 | 0.619 | 1.000 |
| rs877954  | 134552353 | 31 | 0.92 | 0.78 | - | 1.08 | 0.309 | 0.999 | 0.86 | 0.69 | - | 1.07 | 0.169 | 0.980 | 1.00 | 0.71 | - | 1.43 | 0.984 | 1.000 |
| rs9409929 | 134566458 | 32 | 0.88 | 0.75 | - | 1.04 | 0.144 | 0.967 | 0.80 | 0.64 | - | 1.00 | 0.055 | 0.760 | 0.98 | 0.70 | - | 1.37 | 0.909 | 1.000 |

**Distal Neoplasia**

|            |           |    |      |      |   |      |       |       |      |      |   |      |       |       |      |      |   |      |       |       |
|------------|-----------|----|------|------|---|------|-------|-------|------|------|---|------|-------|-------|------|------|---|------|-------|-------|
| rs1007971  | 134561859 | 1  | 1.10 | 0.88 | - | 1.36 | 0.408 | 1.000 | 1.17 | 0.91 | - | 1.50 | 0.224 | 0.996 | 0.79 | 0.39 | - | 1.59 | 0.508 | 1.000 |
| rs10114634 | 134527207 | 2  | 1.07 | 0.70 | - | 1.64 | 0.764 | 1.000 | 1.08 | 0.70 | - | 1.67 | 0.721 | 1.000 | NA   | NA   | - | NA   | NA    | NA    |
| rs1045570  | 134558256 | 3  | 1.10 | 0.86 | - | 1.40 | 0.438 | 1.000 | 1.16 | 0.89 | - | 1.52 | 0.260 | 0.998 | 0.60 | 0.20 | - | 1.75 | 0.348 | 1.000 |
| rs10776909 | 134514691 | 4  | 1.11 | 0.90 | - | 1.37 | 0.349 | 1.000 | 1.28 | 1.00 | - | 1.64 | 0.048 | 0.741 | 0.38 | 0.16 | - | 0.90 | 0.028 | 0.569 |
| rs11102986 | 134511490 | 5  | 1.10 | 0.88 | - | 1.37 | 0.415 | 1.000 | 1.22 | 0.95 | - | 1.58 | 0.117 | 0.955 | 0.43 | 0.17 | - | 1.10 | 0.079 | 0.884 |
| rs11103473 | 134513574 | 6  | 1.14 | 0.95 | - | 1.37 | 0.163 | 0.983 | 1.25 | 0.98 | - | 1.61 | 0.077 | 0.879 | 1.03 | 0.71 | - | 1.51 | 0.869 | 1.000 |
| rs12004589 | 134516670 | 7  | 1.10 | 0.85 | - | 1.44 | 0.469 | 1.000 | 1.08 | 0.80 | - | 1.46 | 0.614 | 1.000 | 1.59 | 0.64 | - | 3.98 | 0.320 | 0.999 |
| rs12004786 | 134536181 | 8  | 1.52 | 0.71 | - | 3.25 | 0.285 | 0.999 | 1.52 | 0.71 | - | 3.25 | 0.285 | 0.999 | NA   | NA   | - | NA   | NA    | NA    |
| rs1536475  | 134547101 | 9  | 1.09 | 0.88 | - | 1.35 | 0.436 | 1.000 | 1.20 | 0.93 | - | 1.54 | 0.170 | 0.986 | 0.66 | 0.32 | - | 1.36 | 0.255 | 0.998 |
| rs1805343  | 134554231 | 10 | 1.08 | 0.90 | - | 1.29 | 0.405 | 1.000 | 1.16 | 0.91 | - | 1.49 | 0.233 | 0.997 | 0.98 | 0.66 | - | 1.44 | 0.909 | 1.000 |
| rs1805352  | 134525894 | 11 | 1.05 | 0.87 | - | 1.27 | 0.603 | 1.000 | 1.10 | 0.86 | - | 1.40 | 0.439 | 1.000 | 0.96 | 0.62 | - | 1.48 | 0.852 | 1.000 |
| rs3118523  | 134561466 | 12 | 1.09 | 0.87 | - | 1.36 | 0.452 | 1.000 | 1.12 | 0.86 | - | 1.44 | 0.403 | 1.000 | 1.02 | 0.50 | - | 2.10 | 0.955 | 1.000 |
| rs3118526  | 134563302 | 13 | 1.04 | 0.79 | - | 1.35 | 0.792 | 1.000 | 1.06 | 0.79 | - | 1.42 | 0.709 | 1.000 | 0.84 | 0.28 | - | 2.55 | 0.760 | 1.000 |
| rs3118529  | 134530860 | 14 | 1.06 | 0.88 | - | 1.28 | 0.553 | 1.000 | 1.10 | 0.87 | - | 1.41 | 0.424 | 1.000 | 0.98 | 0.64 | - | 1.52 | 0.943 | 1.000 |
| rs3118535  | 134531766 | 15 | 0.82 | 0.58 | - | 1.16 | 0.256 | 0.998 | 0.83 | 0.58 | - | 1.19 | 0.314 | 0.999 | 0.39 | 0.05 | - | 3.15 | 0.379 | 1.000 |
| rs3118536  | 134534407 | 16 | 1.08 | 0.86 | - | 1.36 | 0.501 | 1.000 | 1.20 | 0.93 | - | 1.55 | 0.166 | 0.984 | 0.44 | 0.17 | - | 1.14 | 0.092 | 0.914 |
| rs3118570  | 134546800 | 17 | 1.07 | 0.86 | - | 1.33 | 0.568 | 1.000 | 1.16 | 0.90 | - | 1.50 | 0.256 | 0.998 | 0.62 | 0.29 | - | 1.34 | 0.227 | 0.996 |
| rs3118571  | 134544123 | 18 | 1.08 | 0.90 | - | 1.29 | 0.423 | 1.000 | 1.11 | 0.87 | - | 1.42 | 0.406 | 1.000 | 1.08 | 0.74 | - | 1.57 | 0.699 | 1.000 |
| rs3132293  | 134551767 | 19 | 1.01 | 0.83 | - | 1.24 | 0.899 | 1.000 | 1.09 | 0.85 | - | 1.39 | 0.512 | 1.000 | 0.74 | 0.42 | - | 1.29 | 0.291 | 0.999 |
| rs3132296  | 134528576 | 20 | 1.07 | 0.89 | - | 1.30 | 0.470 | 1.000 | 1.12 | 0.88 | - | 1.43 | 0.367 | 1.000 | 1.01 | 0.65 | - | 1.56 | 0.972 | 0.999 |
| rs3132297  | 134527811 | 21 | 1.11 | 0.89 | - | 1.39 | 0.361 | 1.000 | 1.23 | 0.95 | - | 1.59 | 0.112 | 0.948 | 0.47 | 0.18 | - | 1.21 | 0.119 | 0.956 |
| rs3132299  | 134524760 | 22 | 1.09 | 0.88 | - | 1.37 | 0.427 | 1.000 | 1.21 | 0.94 | - | 1.56 | 0.140 | 0.974 | 0.50 | 0.21 | - | 1.21 | 0.124 | 0.960 |
| rs3132300  | 134521430 | 23 | 1.10 | 0.89 | - | 1.36 | 0.390 | 1.000 | 1.22 | 0.95 | - | 1.56 | 0.117 | 0.954 | 0.60 | 0.29 | - | 1.23 | 0.161 | 0.984 |
| rs3132301  | 134519975 | 24 | 1.07 | 0.86 | - | 1.33 | 0.565 | 1.000 | 1.20 | 0.93 | - | 1.54 | 0.165 | 0.984 | 0.44 | 0.19 | - | 1.05 | 0.064 | 0.828 |
| rs4240705  | 134537345 | 25 | 1.08 | 0.90 | - | 1.30 | 0.396 | 1.000 | 1.08 | 0.84 | - | 1.39 | 0.527 | 1.000 | 1.15 | 0.80 | - | 1.66 | 0.436 | 1.000 |

|           |           |    |      |      |   |      |       |       |      |      |   |      |       |       |      |      |   |      |       |       |
|-----------|-----------|----|------|------|---|------|-------|-------|------|------|---|------|-------|-------|------|------|---|------|-------|-------|
| rs4240711 | 134555251 | 26 | 1.09 | 0.91 | - | 1.30 | 0.373 | 1.000 | 1.16 | 0.90 | - | 1.48 | 0.247 | 0.998 | 1.01 | 0.69 | - | 1.49 | 0.959 | 1.000 |
| rs4842196 | 134559173 | 27 | 1.14 | 0.94 | - | 1.39 | 0.185 | 0.991 | 1.23 | 0.96 | - | 1.57 | 0.100 | 0.930 | 0.99 | 0.59 | - | 1.66 | 0.969 | 1.000 |
| rs748964  | 134560034 | 28 | 1.11 | 0.86 | - | 1.44 | 0.415 | 1.000 | 1.16 | 0.88 | - | 1.55 | 0.294 | 0.999 | 0.74 | 0.25 | - | 2.22 | 0.595 | 1.000 |
| rs7861779 | 134535406 | 29 | 1.01 | 0.79 | - | 1.30 | 0.925 | 1.000 | 0.96 | 0.73 | - | 1.28 | 0.801 | 1.000 | 1.60 | 0.71 | - | 3.59 | 0.258 | 0.998 |
| rs875444  | 134521249 | 30 | 1.11 | 0.92 | - | 1.32 | 0.270 | 0.998 | 1.17 | 0.90 | - | 1.51 | 0.231 | 0.997 | 1.09 | 0.77 | - | 1.53 | 0.626 | 1.000 |
| rs877954  | 134552353 | 31 | 1.09 | 0.91 | - | 1.30 | 0.368 | 1.000 | 1.15 | 0.90 | - | 1.47 | 0.262 | 0.998 | 1.03 | 0.70 | - | 1.51 | 0.892 | 1.000 |
| rs9409929 | 134566458 | 32 | 0.89 | 0.74 | - | 1.07 | 0.204 | 0.994 | 0.84 | 0.65 | - | 1.07 | 0.154 | 0.982 | 0.91 | 0.63 | - | 1.33 | 0.642 | 1.000 |

<sup>1</sup>Locus numbers correspond to locus numbers in heatmaps found in Figure 3.

<sup>2</sup>*P*-values were adjusted for multiple comparisons using a modification of  $P_{ACT}$  for correlated tests developed by Conneely and Boehnke (41).



**Supplemental Table 2. Association between SNPs on *VDR* gene (chromosome 12) and metachronous colorectal neoplasia**

| SNP             | Position | Locus <sup>1</sup> | Additive inheritance |       |   |      |                   |       | Dominant inheritance |      |   |                   | Recessive inheritance |       |      |      |                   |       |       |       |
|-----------------|----------|--------------------|----------------------|-------|---|------|-------------------|-------|----------------------|------|---|-------------------|-----------------------|-------|------|------|-------------------|-------|-------|-------|
|                 |          |                    | OR                   | 95%CI |   | p    | pACT <sup>2</sup> | OR    | 95%CI                |      | p | pACT <sup>2</sup> | OR                    | 95%CI |      | p    | pACT <sup>2</sup> |       |       |       |
| <b>Any site</b> |          |                    |                      |       |   |      |                   |       |                      |      |   |                   |                       |       |      |      |                   |       |       |       |
| rs10783215      | 46518165 | 1                  | 1.02                 | 0.88  | - | 1.18 | 0.829             | 1.000 | 1.04                 | 0.82 | - | 1.32              | 0.739                 | 1.000 | 1.00 | 0.78 | -                 | 1.28  | 0.992 | 0.992 |
| rs10875695      | 46579304 | 2                  | 0.99                 | 0.84  | - | 1.17 | 0.935             | 1.000 | 1.06                 | 0.86 | - | 1.30              | 0.608                 | 1.000 | 0.78 | 0.51 | -                 | 1.17  | 0.230 | 1.000 |
| rs11168267      | 46537809 | 3                  | 0.82                 | 0.63  | - | 1.05 | 0.120             | 0.995 | 0.78                 | 0.60 | - | 1.03              | 0.083                 | 0.978 | 1.18 | 0.38 | -                 | 3.67  | 0.776 | 1.000 |
| rs11168287      | 46571681 | 4                  | 0.91                 | 0.78  | - | 1.05 | 0.197             | 1.000 | 0.83                 | 0.66 | - | 1.05              | 0.124                 | 0.996 | 0.93 | 0.73 | -                 | 1.19  | 0.579 | 1.000 |
| rs11168293      | 46579983 | 5                  | 0.92                 | 0.79  | - | 1.07 | 0.286             | 1.000 | 0.88                 | 0.72 | - | 1.09              | 0.237                 | 1.000 | 0.93 | 0.67 | -                 | 1.30  | 0.688 | 1.000 |
| rs11568820      | 46588812 | 6                  | 0.95                 | 0.79  | - | 1.13 | 0.566             | 1.000 | 0.95                 | 0.77 | - | 1.17              | 0.618                 | 1.000 | 0.90 | 0.55 | -                 | 1.47  | 0.669 | 1.000 |
| rs11574026      | 46574513 | 7                  | 0.93                 | 0.74  | - | 1.15 | 0.495             | 1.000 | 0.92                 | 0.72 | - | 1.17              | 0.503                 | 1.000 | 0.89 | 0.37 | -                 | 2.11  | 0.784 | 1.000 |
| rs11574077      | 46539194 | 8                  | 1.26                 | 0.89  | - | 1.79 | 0.196             | 1.000 | 1.20                 | 0.82 | - | 1.75              | 0.337                 | 1.000 | 5.96 | 0.69 | -                 | 51.14 | 0.104 | 0.991 |
| rs11574139      | 46521822 | 9                  | 0.83                 | 0.54  | - | 1.26 | 0.381             | 1.000 | 0.80                 | 0.52 | - | 1.23              | 0.314                 | 1.000 | NA   | NA   | -                 | NA    | NA    | NA    |
| rs11574143      | 46521184 | 10                 | 0.85                 | 0.67  | - | 1.08 | 0.192             | 1.000 | 0.82                 | 0.63 | - | 1.07              | 0.141                 | 0.998 | 1.06 | 0.43 | -                 | 2.63  | 0.896 | 1.000 |
| rs12581281      | 46581400 | 11                 | 1.14                 | 0.66  | - | 1.97 | 0.644             | 1.000 | 1.10                 | 0.62 | - | 1.93              | 0.750                 | 1.000 | NA   | NA   | -                 | NA    | NA    | NA    |
| rs12721364      | 46517697 | 12                 | 1.08                 | 0.88  | - | 1.33 | 0.445             | 1.000 | 1.02                 | 0.81 | - | 1.29              | 0.859                 | 1.000 | 2.28 | 1.05 | -                 | 4.94  | 0.037 | 0.852 |
| rs1540339       | 46543593 | 13                 | 1.07                 | 0.92  | - | 1.25 | 0.366             | 1.000 | 1.06                 | 0.86 | - | 1.31              | 0.605                 | 1.000 | 1.17 | 0.87 | -                 | 1.58  | 0.289 | 1.000 |
| rs1544410       | 46526102 | 14                 | 1.01                 | 0.87  | - | 1.18 | 0.864             | 1.000 | 0.98                 | 0.79 | - | 1.21              | 0.825                 | 1.000 | 1.09 | 0.82 | -                 | 1.46  | 0.537 | 1.000 |
| rs1989969       | 46564277 | 15                 | 0.93                 | 0.80  | - | 1.08 | 0.352             | 1.000 | 0.92                 | 0.74 | - | 1.14              | 0.440                 | 1.000 | 0.90 | 0.68 | -                 | 1.19  | 0.449 | 1.000 |
| rs2107301       | 46541837 | 16                 | 1.03                 | 0.88  | - | 1.21 | 0.727             | 1.000 | 1.02                 | 0.83 | - | 1.26              | 0.850                 | 1.000 | 1.09 | 0.75 | -                 | 1.58  | 0.641 | 1.000 |
| rs2189480       | 46550095 | 17                 | 1.21                 | 1.04  | - | 1.40 | 0.014             | 0.559 | 1.24                 | 1.01 | - | 1.54              | 0.043                 | 0.887 | 1.36 | 1.01 | -                 | 1.83  | 0.042 | 0.882 |
| rs2238135       | 46564457 | 18                 | 1.07                 | 0.90  | - | 1.27 | 0.420             | 1.000 | 1.17                 | 0.95 | - | 1.44              | 0.144                 | 0.998 | 0.80 | 0.51 | -                 | 1.25  | 0.327 | 1.000 |
| rs2238136       | 46563980 | 19                 | 1.09                 | 0.92  | - | 1.28 | 0.334             | 1.000 | 1.14                 | 0.93 | - | 1.41              | 0.209                 | 1.000 | 0.98 | 0.64 | -                 | 1.49  | 0.917 | 1.000 |
| rs2239179       | 46544033 | 20                 | 0.93                 | 0.80  | - | 1.08 | 0.317             | 1.000 | 0.91                 | 0.73 | - | 1.13              | 0.389                 | 1.000 | 0.90 | 0.68 | -                 | 1.19  | 0.450 | 1.000 |
| rs2239180       | 46542313 | 21                 | 1.01                 | 0.80  | - | 1.28 | 0.908             | 1.000 | 0.97                 | 0.76 | - | 1.25              | 0.830                 | 1.000 | 1.98 | 0.71 | -                 | 5.47  | 0.189 | 1.000 |
| rs2239182       | 46541678 | 22                 | 1.01                 | 0.87  | - | 1.17 | 0.935             | 1.000 | 0.96                 | 0.75 | - | 1.22              | 0.737                 | 1.000 | 1.06 | 0.83 | -                 | 1.35  | 0.644 | 1.000 |
| rs2239186       | 46555677 | 23                 | 1.16                 | 0.96  | - | 1.38 | 0.117             | 0.995 | 1.24                 | 1.00 | - | 1.53              | 0.054                 | 0.928 | 0.97 | 0.59 | -                 | 1.61  | 0.912 | 1.000 |
| rs2248098       | 46539623 | 24                 | 1.02                 | 0.88  | - | 1.19 | 0.745             | 1.000 | 1.02                 | 0.81 | - | 1.29              | 0.841                 | 1.000 | 1.04 | 0.81 | -                 | 1.34  | 0.738 | 1.000 |

|           |          |    |      |      |   |      |       |       |      |      |   |      |       |       |      |      |   |      |       |       |
|-----------|----------|----|------|------|---|------|-------|-------|------|------|---|------|-------|-------|------|------|---|------|-------|-------|
| rs2254210 | 46559981 | 25 | 0.87 | 0.75 | - | 1.02 | 0.080 | 0.976 | 0.81 | 0.66 | - | 1.01 | 0.057 | 0.934 | 0.89 | 0.66 | - | 1.19 | 0.422 | 1.000 |
| rs2283343 | 46541045 | 26 | 1.04 | 0.90 | - | 1.21 | 0.588 | 1.000 | 1.04 | 0.82 | - | 1.32 | 0.738 | 1.000 | 1.07 | 0.84 | - | 1.37 | 0.579 | 1.000 |
| rs2525044 | 46528523 | 27 | 1.04 | 0.90 | - | 1.21 | 0.589 | 1.000 | 1.05 | 0.84 | - | 1.31 | 0.675 | 1.000 | 1.07 | 0.81 | - | 1.40 | 0.640 | 1.000 |
| rs3782905 | 46552434 | 28 | 0.85 | 0.73 | - | 1.00 | 0.051 | 0.917 | 0.81 | 0.66 | - | 1.00 | 0.051 | 0.919 | 0.83 | 0.58 | - | 1.19 | 0.308 | 1.000 |
| rs3819545 | 46551273 | 29 | 1.21 | 1.04 | - | 1.41 | 0.013 | 0.531 | 1.27 | 1.02 | - | 1.58 | 0.032 | 0.817 | 1.32 | 0.99 | - | 1.75 | 0.059 | 0.940 |
| rs3923693 | 46623896 | 30 | 0.94 | 0.75 | - | 1.18 | 0.599 | 1.000 | 0.92 | 0.72 | - | 1.17 | 0.498 | 1.000 | 1.18 | 0.49 | - | 2.86 | 0.706 | 1.000 |
| rs4237856 | 46624317 | 31 | 0.97 | 0.82 | - | 1.15 | 0.713 | 1.000 | 1.03 | 0.83 | - | 1.27 | 0.793 | 1.000 | 0.72 | 0.47 | - | 1.12 | 0.145 | 0.998 |
| rs4328262 | 46571915 | 32 | 1.14 | 0.98 | - | 1.33 | 0.082 | 0.977 | 1.10 | 0.88 | - | 1.37 | 0.389 | 1.000 | 1.35 | 1.02 | - | 1.77 | 0.034 | 0.831 |
| rs4516035 | 46586093 | 33 | 0.97 | 0.83 | - | 1.12 | 0.647 | 1.000 | 0.93 | 0.75 | - | 1.16 | 0.535 | 1.000 | 0.99 | 0.75 | - | 1.31 | 0.952 | 1.000 |
| rs4760648 | 46566932 | 34 | 1.01 | 0.87 | - | 1.17 | 0.879 | 1.000 | 1.08 | 0.86 | - | 1.34 | 0.502 | 1.000 | 0.93 | 0.72 | - | 1.21 | 0.602 | 1.000 |
| rs4760655 | 46580398 | 35 | 1.08 | 0.93 | - | 1.25 | 0.328 | 1.000 | 1.10 | 0.89 | - | 1.35 | 0.396 | 1.000 | 1.12 | 0.83 | - | 1.52 | 0.458 | 1.000 |
| rs4760658 | 46582753 | 36 | 0.89 | 0.77 | - | 1.04 | 0.158 | 0.999 | 0.86 | 0.70 | - | 1.06 | 0.152 | 0.999 | 0.88 | 0.64 | - | 1.22 | 0.456 | 1.000 |
| rs7299460 | 46582535 | 37 | 1.01 | 0.86 | - | 1.18 | 0.935 | 1.000 | 0.99 | 0.80 | - | 1.22 | 0.927 | 1.000 | 1.06 | 0.75 | - | 1.50 | 0.740 | 1.000 |
| rs7310552 | 46590126 | 38 | 0.96 | 0.82 | - | 1.11 | 0.558 | 1.000 | 0.92 | 0.74 | - | 1.14 | 0.428 | 1.000 | 0.99 | 0.75 | - | 1.31 | 0.943 | 1.000 |
| rs731236  | 46525024 | 39 | 1.00 | 0.86 | - | 1.17 | 0.960 | 1.000 | 0.97 | 0.79 | - | 1.21 | 0.814 | 1.000 | 1.06 | 0.79 | - | 1.42 | 0.679 | 1.000 |
| rs7970314 | 46594441 | 40 | 0.96 | 0.81 | - | 1.14 | 0.648 | 1.000 | 0.95 | 0.77 | - | 1.17 | 0.626 | 1.000 | 0.97 | 0.62 | - | 1.51 | 0.885 | 1.000 |
| rs886441  | 46549231 | 41 | 0.90 | 0.75 | - | 1.09 | 0.293 | 1.000 | 0.87 | 0.70 | - | 1.09 | 0.225 | 1.000 | 1.00 | 0.56 | - | 1.77 | 0.988 | 1.000 |
| rs987849  | 46540943 | 42 | 1.02 | 0.88 | - | 1.18 | 0.771 | 1.000 | 1.04 | 0.83 | - | 1.30 | 0.755 | 1.000 | 1.02 | 0.79 | - | 1.32 | 0.877 | 1.000 |

**Proximal Neoplasia**

|            |          |    |      |      |   |      |       |       |      |      |   |      |       |       |      |      |   |       |       |       |
|------------|----------|----|------|------|---|------|-------|-------|------|------|---|------|-------|-------|------|------|---|-------|-------|-------|
| rs10783215 | 46518165 | 1  | 0.96 | 0.82 | - | 1.13 | 0.625 | 1.000 | 0.89 | 0.70 | - | 1.14 | 0.370 | 1.000 | 1.02 | 0.78 | - | 1.32  | 0.900 | 1.000 |
| rs10875695 | 46579304 | 2  | 1.04 | 0.87 | - | 1.24 | 0.686 | 1.000 | 1.01 | 0.81 | - | 1.27 | 0.897 | 1.000 | 1.17 | 0.77 | - | 1.79  | 0.462 | 1.000 |
| rs11168267 | 46537809 | 3  | 0.88 | 0.67 | - | 1.16 | 0.361 | 1.000 | 0.86 | 0.64 | - | 1.16 | 0.326 | 1.000 | 1.01 | 0.30 | - | 3.36  | 0.993 | 1.000 |
| rs11168287 | 46571681 | 4  | 0.96 | 0.82 | - | 1.12 | 0.574 | 1.000 | 0.89 | 0.69 | - | 1.14 | 0.344 | 1.000 | 1.01 | 0.78 | - | 1.30  | 0.968 | 1.000 |
| rs11168293 | 46579983 | 5  | 0.90 | 0.76 | - | 1.06 | 0.192 | 1.000 | 0.85 | 0.68 | - | 1.06 | 0.146 | 0.999 | 0.92 | 0.65 | - | 1.30  | 0.633 | 1.000 |
| rs11568820 | 46588812 | 6  | 1.11 | 0.92 | - | 1.34 | 0.289 | 1.000 | 1.11 | 0.89 | - | 1.39 | 0.370 | 1.000 | 1.25 | 0.75 | - | 2.08  | 0.397 | 1.000 |
| rs11574026 | 46574513 | 7  | 0.92 | 0.73 | - | 1.16 | 0.487 | 1.000 | 0.89 | 0.69 | - | 1.15 | 0.369 | 1.000 | 1.25 | 0.52 | - | 3.04  | 0.620 | 1.000 |
| rs11574077 | 46539194 | 8  | 1.38 | 0.97 | - | 1.98 | 0.077 | 0.977 | 1.35 | 0.91 | - | 1.99 | 0.135 | 0.998 | 4.07 | 0.74 | - | 22.33 | 0.106 | 0.993 |
| rs11574139 | 46521822 | 9  | 0.81 | 0.51 | - | 1.27 | 0.352 | 1.000 | 0.81 | 0.51 | - | 1.29 | 0.384 | 1.000 | NA   | NA   | - | NA    | NA    | NA    |
| rs11574143 | 46521184 | 10 | 0.99 | 0.77 | - | 1.27 | 0.949 | 1.000 | 1.00 | 0.76 | - | 1.31 | 0.978 | 1.000 | 0.93 | 0.35 | - | 2.46  | 0.882 | 1.000 |

|            |          |    |      |      |   |      |       |       |      |      |   |      |       |       |      |      |    |      |       |       |
|------------|----------|----|------|------|---|------|-------|-------|------|------|---|------|-------|-------|------|------|----|------|-------|-------|
| rs12581281 | 46581400 | 11 | 1.20 | 0.68 | - | 2.12 | 0.523 | 1.000 | 1.15 | 0.64 | - | 2.06 | 0.650 | 1.000 | NA   | NA   | NA | NA   | NA    |       |
| rs12721364 | 46517697 | 12 | 1.00 | 0.80 | - | 1.25 | 0.993 | 1.000 | 0.95 | 0.74 | - | 1.22 | 0.696 | 1.000 | 1.63 | 0.75 | -  | 3.50 | 0.214 | 1.000 |
| rs1540339  | 46543593 | 13 | 1.01 | 0.86 | - | 1.19 | 0.861 | 1.000 | 1.00 | 0.80 | - | 1.25 | 0.988 | 1.000 | 1.06 | 0.78 | -  | 1.45 | 0.713 | 1.000 |
| rs1544410  | 46526102 | 14 | 1.05 | 0.89 | - | 1.23 | 0.548 | 1.000 | 1.00 | 0.80 | - | 1.27 | 0.969 | 1.000 | 1.18 | 0.88 | -  | 1.59 | 0.278 | 1.000 |
| rs1989969  | 46564277 | 15 | 0.95 | 0.81 | - | 1.11 | 0.486 | 1.000 | 0.92 | 0.73 | - | 1.16 | 0.483 | 1.000 | 0.94 | 0.70 | -  | 1.26 | 0.684 | 1.000 |
| rs2107301  | 46541837 | 16 | 0.99 | 0.84 | - | 1.18 | 0.917 | 1.000 | 0.98 | 0.78 | - | 1.22 | 0.847 | 1.000 | 1.02 | 0.69 | -  | 1.51 | 0.919 | 1.000 |
| rs2189480  | 46550095 | 17 | 1.19 | 1.02 | - | 1.39 | 0.032 | 0.817 | 1.25 | 1.00 | - | 1.57 | 0.051 | 0.927 | 1.27 | 0.93 | -  | 1.73 | 0.128 | 0.997 |
| rs2238135  | 46564457 | 18 | 1.06 | 0.88 | - | 1.26 | 0.560 | 1.000 | 1.09 | 0.87 | - | 1.36 | 0.438 | 1.000 | 0.97 | 0.61 | -  | 1.55 | 0.905 | 1.000 |
| rs2238136  | 46563980 | 19 | 1.05 | 0.88 | - | 1.26 | 0.562 | 1.000 | 1.06 | 0.85 | - | 1.32 | 0.615 | 1.000 | 1.10 | 0.71 | -  | 1.71 | 0.661 | 1.000 |
| rs2239179  | 46544033 | 20 | 1.01 | 0.86 | - | 1.19 | 0.900 | 1.000 | 0.97 | 0.77 | - | 1.23 | 0.812 | 1.000 | 1.08 | 0.81 | -  | 1.45 | 0.599 | 1.000 |
| rs2239180  | 46542313 | 21 | 1.01 | 0.79 | - | 1.30 | 0.912 | 1.000 | 0.96 | 0.74 | - | 1.26 | 0.770 | 1.000 | 2.33 | 0.84 | -  | 6.45 | 0.105 | 0.994 |
| rs2239182  | 46541678 | 22 | 1.06 | 0.90 | - | 1.24 | 0.497 | 1.000 | 1.08 | 0.83 | - | 1.40 | 0.575 | 1.000 | 1.07 | 0.83 | -  | 1.39 | 0.586 | 1.000 |
| rs2239186  | 46555677 | 23 | 1.15 | 0.95 | - | 1.39 | 0.155 | 0.999 | 1.26 | 1.00 | - | 1.58 | 0.046 | 0.907 | 0.82 | 0.47 | -  | 1.43 | 0.478 | 1.000 |
| rs2248098  | 46539623 | 24 | 0.96 | 0.82 | - | 1.12 | 0.622 | 1.000 | 0.92 | 0.72 | - | 1.18 | 0.535 | 1.000 | 0.98 | 0.75 | -  | 1.27 | 0.866 | 1.000 |
| rs2254210  | 46559981 | 25 | 0.86 | 0.74 | - | 1.01 | 0.074 | 0.975 | 0.81 | 0.65 | - | 1.02 | 0.068 | 0.967 | 0.85 | 0.62 | -  | 1.17 | 0.327 | 1.000 |
| rs2283343  | 46541045 | 26 | 0.99 | 0.84 | - | 1.15 | 0.871 | 1.000 | 0.97 | 0.75 | - | 1.24 | 0.788 | 1.000 | 1.00 | 0.77 | -  | 1.30 | 0.993 | 1.000 |
| rs2525044  | 46528523 | 27 | 0.96 | 0.82 | - | 1.13 | 0.640 | 1.000 | 0.99 | 0.78 | - | 1.25 | 0.907 | 1.000 | 0.90 | 0.67 | -  | 1.21 | 0.482 | 1.000 |
| rs3782905  | 46552434 | 28 | 0.90 | 0.76 | - | 1.07 | 0.217 | 1.000 | 0.83 | 0.67 | - | 1.04 | 0.105 | 0.993 | 1.00 | 0.69 | -  | 1.45 | 0.996 | 0.996 |
| rs3819545  | 46551273 | 29 | 1.12 | 0.95 | - | 1.31 | 0.165 | 0.999 | 1.15 | 0.91 | - | 1.44 | 0.251 | 1.000 | 1.19 | 0.88 | -  | 1.60 | 0.263 | 1.000 |
| rs3923693  | 46623896 | 30 | 0.92 | 0.72 | - | 1.16 | 0.466 | 1.000 | 0.88 | 0.68 | - | 1.14 | 0.329 | 1.000 | 1.35 | 0.55 | -  | 3.34 | 0.509 | 1.000 |
| rs4237856  | 46624317 | 31 | 0.96 | 0.80 | - | 1.15 | 0.669 | 1.000 | 0.99 | 0.79 | - | 1.24 | 0.950 | 1.000 | 0.80 | 0.50 | -  | 1.27 | 0.344 | 1.000 |
| rs4328262  | 46571915 | 32 | 1.10 | 0.94 | - | 1.29 | 0.218 | 1.000 | 1.06 | 0.83 | - | 1.33 | 0.654 | 1.000 | 1.28 | 0.96 | -  | 1.71 | 0.088 | 0.986 |
| rs4516035  | 46586093 | 33 | 0.91 | 0.78 | - | 1.07 | 0.260 | 1.000 | 0.88 | 0.70 | - | 1.11 | 0.276 | 1.000 | 0.90 | 0.66 | -  | 1.21 | 0.476 | 1.000 |
| rs4760648  | 46566932 | 34 | 1.04 | 0.89 | - | 1.21 | 0.635 | 1.000 | 1.11 | 0.87 | - | 1.40 | 0.396 | 1.000 | 0.98 | 0.74 | -  | 1.29 | 0.877 | 1.000 |
| rs4760655  | 46580398 | 35 | 1.01 | 0.86 | - | 1.19 | 0.898 | 1.000 | 0.96 | 0.77 | - | 1.20 | 0.722 | 1.000 | 1.14 | 0.82 | -  | 1.57 | 0.436 | 1.000 |
| rs4760658  | 46582753 | 36 | 0.88 | 0.75 | - | 1.04 | 0.144 | 0.998 | 0.84 | 0.67 | - | 1.05 | 0.125 | 0.997 | 0.88 | 0.62 | -  | 1.25 | 0.485 | 1.000 |
| rs7299460  | 46582535 | 37 | 1.11 | 0.94 | - | 1.31 | 0.238 | 1.000 | 1.03 | 0.83 | - | 1.29 | 0.775 | 1.000 | 1.47 | 1.03 | -  | 2.09 | 0.034 | 0.836 |
| rs7310552  | 46590126 | 38 | 0.91 | 0.77 | - | 1.06 | 0.233 | 1.000 | 0.87 | 0.69 | - | 1.10 | 0.246 | 1.000 | 0.89 | 0.66 | -  | 1.21 | 0.462 | 1.000 |
| rs731236   | 46525024 | 39 | 1.08 | 0.92 | - | 1.27 | 0.364 | 1.000 | 1.03 | 0.82 | - | 1.30 | 0.769 | 1.000 | 1.23 | 0.91 | -  | 1.67 | 0.178 | 1.000 |

|                         |          |    |      |      |   |      |       |       |      |      |   |      |       |       |      |      |   |       |       |       |
|-------------------------|----------|----|------|------|---|------|-------|-------|------|------|---|------|-------|-------|------|------|---|-------|-------|-------|
| rs7970314               | 46594441 | 40 | 1.12 | 0.93 | - | 1.34 | 0.239 | 1.000 | 1.13 | 0.90 | - | 1.41 | 0.282 | 1.000 | 1.20 | 0.75 | - | 1.91  | 0.444 | 1.000 |
| rs886441                | 46549231 | 41 | 0.92 | 0.75 | - | 1.13 | 0.409 | 1.000 | 0.89 | 0.70 | - | 1.12 | 0.320 | 1.000 | 1.03 | 0.56 | - | 1.91  | 0.916 | 1.000 |
| rs987849                | 46540943 | 42 | 0.96 | 0.82 | - | 1.12 | 0.570 | 1.000 | 0.97 | 0.76 | - | 1.24 | 0.817 | 1.000 | 0.90 | 0.68 | - | 1.19  | 0.464 | 1.000 |
| <b>Distal Neoplasia</b> |          |    |      |      |   |      |       |       |      |      |   |      |       |       |      |      |   |       |       |       |
| rs10783215              | 46518165 | 1  | 0.98 | 0.83 | - | 1.17 | 0.859 | 1.000 | 1.05 | 0.79 | - | 1.38 | 0.743 | 1.000 | 0.91 | 0.68 | - | 1.22  | 0.520 | 1.000 |
| rs10875695              | 46579304 | 2  | 0.89 | 0.73 | - | 1.09 | 0.258 | 1.000 | 0.99 | 0.78 | - | 1.27 | 0.948 | 1.000 | 0.46 | 0.25 | - | 0.83  | 0.010 | 0.446 |
| rs11168267              | 46537809 | 3  | 0.97 | 0.72 | - | 1.31 | 0.865 | 1.000 | 0.92 | 0.66 | - | 1.27 | 0.600 | 1.000 | 2.28 | 0.72 | - | 7.23  | 0.162 | 1.000 |
| rs11168287              | 46571681 | 4  | 0.92 | 0.78 | - | 1.09 | 0.347 | 1.000 | 0.83 | 0.63 | - | 1.08 | 0.165 | 1.000 | 0.98 | 0.74 | - | 1.30  | 0.895 | 1.000 |
| rs11168293              | 46579983 | 5  | 1.07 | 0.89 | - | 1.28 | 0.477 | 1.000 | 1.09 | 0.86 | - | 1.40 | 0.476 | 1.000 | 1.08 | 0.74 | - | 1.57  | 0.699 | 1.000 |
| rs11568820              | 46588812 | 6  | 0.92 | 0.74 | - | 1.13 | 0.425 | 1.000 | 0.93 | 0.72 | - | 1.19 | 0.558 | 1.000 | 0.77 | 0.41 | - | 1.42  | 0.399 | 1.000 |
| rs11574026              | 46574513 | 7  | 1.03 | 0.80 | - | 1.33 | 0.805 | 1.000 | 1.06 | 0.80 | - | 1.40 | 0.673 | 1.000 | 0.74 | 0.25 | - | 2.21  | 0.587 | 1.000 |
| rs11574077              | 46539194 | 8  | 1.02 | 0.68 | - | 1.54 | 0.920 | 1.000 | 0.95 | 0.60 | - | 1.48 | 0.807 | 1.000 | 3.19 | 0.64 | - | 15.86 | 0.157 | 0.999 |
| rs11574139              | 46521822 | 9  | 0.91 | 0.55 | - | 1.49 | 0.694 | 1.000 | 0.86 | 0.51 | - | 1.43 | 0.555 | 1.000 | NA   | NA   | - | NA    | NA    | NA    |
| rs11574143              | 46521184 | 10 | 0.99 | 0.75 | - | 1.30 | 0.939 | 1.000 | 0.95 | 0.70 | - | 1.29 | 0.760 | 1.000 | 1.47 | 0.55 | - | 3.89  | 0.441 | 1.000 |
| rs12581281              | 46581400 | 11 | 0.87 | 0.45 | - | 1.70 | 0.687 | 1.000 | 0.79 | 0.39 | - | 1.59 | 0.503 | 1.000 | NA   | NA   | - | NA    | NA    | NA    |
| rs12721364              | 46517697 | 12 | 0.92 | 0.72 | - | 1.18 | 0.522 | 1.000 | 0.84 | 0.64 | - | 1.11 | 0.231 | 1.000 | 1.89 | 0.86 | - | 4.17  | 0.114 | 0.996 |
| rs1540339               | 46543593 | 13 | 1.01 | 0.85 | - | 1.21 | 0.896 | 1.000 | 1.04 | 0.81 | - | 1.33 | 0.767 | 1.000 | 0.97 | 0.69 | - | 1.38  | 0.876 | 1.000 |
| rs1544410               | 46526102 | 14 | 1.01 | 0.85 | - | 1.21 | 0.882 | 1.000 | 1.03 | 0.80 | - | 1.33 | 0.825 | 1.000 | 1.00 | 0.71 | - | 1.40  | 0.992 | 1.000 |
| rs1989969               | 46564277 | 15 | 0.94 | 0.79 | - | 1.12 | 0.470 | 1.000 | 0.90 | 0.70 | - | 1.16 | 0.419 | 1.000 | 0.95 | 0.68 | - | 1.32  | 0.750 | 1.000 |
| rs2107301               | 46541837 | 16 | 1.06 | 0.88 | - | 1.28 | 0.550 | 1.000 | 1.09 | 0.85 | - | 1.39 | 0.487 | 1.000 | 1.03 | 0.67 | - | 1.59  | 0.888 | 1.000 |
| rs2189480               | 46550095 | 17 | 1.06 | 0.89 | - | 1.27 | 0.479 | 1.000 | 1.09 | 0.85 | - | 1.39 | 0.514 | 1.000 | 1.09 | 0.77 | - | 1.54  | 0.628 | 1.000 |
| rs2238135               | 46564457 | 18 | 1.13 | 0.93 | - | 1.37 | 0.233 | 1.000 | 1.25 | 0.98 | - | 1.60 | 0.072 | 0.972 | 0.83 | 0.49 | - | 1.42  | 0.493 | 1.000 |
| rs2238136               | 46563980 | 19 | 1.13 | 0.93 | - | 1.37 | 0.234 | 1.000 | 1.25 | 0.98 | - | 1.60 | 0.072 | 0.972 | 0.85 | 0.51 | - | 1.41  | 0.526 | 1.000 |
| rs2239179               | 46544033 | 20 | 1.01 | 0.85 | - | 1.21 | 0.908 | 1.000 | 1.08 | 0.84 | - | 1.41 | 0.543 | 1.000 | 0.91 | 0.66 | - | 1.27  | 0.584 | 1.000 |
| rs2239180               | 46542313 | 21 | 1.14 | 0.87 | - | 1.49 | 0.340 | 1.000 | 1.15 | 0.86 | - | 1.54 | 0.333 | 1.000 | 1.15 | 0.36 | - | 3.63  | 0.812 | 1.000 |
| rs2239182               | 46541678 | 22 | 1.06 | 0.89 | - | 1.26 | 0.549 | 1.000 | 1.00 | 0.75 | - | 1.33 | 0.995 | 0.995 | 1.15 | 0.87 | - | 1.52  | 0.331 | 1.000 |
| rs2239186               | 46555677 | 23 | 0.97 | 0.78 | - | 1.20 | 0.754 | 1.000 | 1.00 | 0.78 | - | 1.29 | 0.995 | 1.000 | 0.75 | 0.39 | - | 1.42  | 0.371 | 1.000 |
| rs2248098               | 46539623 | 24 | 0.95 | 0.80 | - | 1.12 | 0.529 | 1.000 | 0.93 | 0.71 | - | 1.21 | 0.578 | 1.000 | 0.93 | 0.69 | - | 1.25  | 0.640 | 1.000 |
| rs2254210               | 46559981 | 25 | 0.98 | 0.82 | - | 1.17 | 0.853 | 1.000 | 0.97 | 0.76 | - | 1.24 | 0.806 | 1.000 | 1.00 | 0.71 | - | 1.40  | 0.979 | 1.000 |

|           |          |    |      |      |   |      |       |       |      |      |   |      |       |       |      |      |   |      |       |       |
|-----------|----------|----|------|------|---|------|-------|-------|------|------|---|------|-------|-------|------|------|---|------|-------|-------|
| rs2283343 | 46541045 | 26 | 0.93 | 0.79 | - | 1.11 | 0.427 | 1.000 | 0.89 | 0.67 | - | 1.16 | 0.380 | 1.000 | 0.94 | 0.71 | - | 1.25 | 0.681 | 1.000 |
| rs2525044 | 46528523 | 27 | 1.01 | 0.84 | - | 1.20 | 0.949 | 1.000 | 0.95 | 0.73 | - | 1.23 | 0.706 | 1.000 | 1.10 | 0.80 | - | 1.50 | 0.565 | 1.000 |
| rs3782905 | 46552434 | 28 | 0.99 | 0.82 | - | 1.19 | 0.893 | 1.000 | 0.97 | 0.76 | - | 1.24 | 0.803 | 1.000 | 1.03 | 0.68 | - | 1.54 | 0.902 | 1.000 |
| rs3819545 | 46551273 | 29 | 1.09 | 0.92 | - | 1.30 | 0.327 | 1.000 | 1.18 | 0.91 | - | 1.52 | 0.217 | 1.000 | 1.04 | 0.74 | - | 1.45 | 0.820 | 1.000 |
| rs3923693 | 46623896 | 30 | 0.99 | 0.76 | - | 1.28 | 0.924 | 1.000 | 1.00 | 0.75 | - | 1.33 | 0.991 | 1.000 | 0.79 | 0.26 | - | 2.38 | 0.676 | 1.000 |
| rs4237856 | 46624317 | 31 | 0.99 | 0.81 | - | 1.20 | 0.899 | 1.000 | 1.03 | 0.80 | - | 1.31 | 0.839 | 1.000 | 0.82 | 0.49 | - | 1.39 | 0.465 | 1.000 |
| rs4328262 | 46571915 | 32 | 1.04 | 0.87 | - | 1.23 | 0.691 | 1.000 | 0.99 | 0.76 | - | 1.28 | 0.925 | 1.000 | 1.15 | 0.84 | - | 1.57 | 0.396 | 1.000 |
| rs4516035 | 46586093 | 33 | 1.00 | 0.84 | - | 1.19 | 0.988 | 1.000 | 0.99 | 0.77 | - | 1.27 | 0.914 | 1.000 | 1.03 | 0.74 | - | 1.42 | 0.867 | 1.000 |
| rs4760648 | 46566932 | 34 | 0.94 | 0.79 | - | 1.11 | 0.451 | 1.000 | 0.94 | 0.73 | - | 1.21 | 0.628 | 1.000 | 0.88 | 0.65 | - | 1.21 | 0.434 | 1.000 |
| rs4760655 | 46580398 | 35 | 1.08 | 0.90 | - | 1.29 | 0.404 | 1.000 | 1.09 | 0.85 | - | 1.40 | 0.488 | 1.000 | 1.13 | 0.80 | - | 1.60 | 0.496 | 1.000 |
| rs4760658 | 46582753 | 36 | 1.03 | 0.86 | - | 1.23 | 0.764 | 1.000 | 1.05 | 0.82 | - | 1.34 | 0.713 | 1.000 | 1.01 | 0.70 | - | 1.47 | 0.950 | 1.000 |
| rs7299460 | 46582535 | 37 | 0.88 | 0.73 | - | 1.06 | 0.176 | 1.000 | 0.95 | 0.74 | - | 1.21 | 0.660 | 1.000 | 0.59 | 0.37 | - | 0.94 | 0.025 | 0.748 |
| rs7310552 | 46590126 | 38 | 1.00 | 0.84 | - | 1.19 | 0.976 | 1.000 | 0.98 | 0.76 | - | 1.26 | 0.857 | 1.000 | 1.05 | 0.76 | - | 1.46 | 0.771 | 1.000 |
| rs731236  | 46525024 | 39 | 0.97 | 0.81 | - | 1.16 | 0.723 | 1.000 | 0.98 | 0.76 | - | 1.26 | 0.875 | 1.000 | 0.92 | 0.65 | - | 1.30 | 0.640 | 1.000 |
| rs7970314 | 46594441 | 40 | 0.91 | 0.74 | - | 1.12 | 0.367 | 1.000 | 0.89 | 0.70 | - | 1.14 | 0.361 | 1.000 | 0.90 | 0.52 | - | 1.54 | 0.694 | 1.000 |
| rs886441  | 46549231 | 41 | 0.82 | 0.65 | - | 1.04 | 0.096 | 0.991 | 0.79 | 0.60 | - | 1.03 | 0.077 | 0.978 | 0.85 | 0.42 | - | 1.74 | 0.665 | 1.000 |
| rs987849  | 46540943 | 42 | 0.95 | 0.80 | - | 1.13 | 0.570 | 1.000 | 0.90 | 0.69 | - | 1.17 | 0.423 | 1.000 | 0.99 | 0.73 | - | 1.34 | 0.940 | 1.000 |

<sup>1</sup>Locus numbers correspond to locus numbers in heatmaps found in Figure 3.

<sup>2</sup>*P*-values were adjusted for multiple comparisons using a modification of  $P_{ACT}$  for correlated tests developed by Conneely and Boehnke (41).
